# Supplementary material for: Electronic structure of positive and negative polarons in functionalized dithienylthiazolo[5,4-d]thiazoles: a combined EPR and DFT study
Source: Royal Society of Chemistry journal article supplement (doi:10.1039/c3cp54635g), 2014-01-01
Supplement: c3cp54635g.pdf [file c3cp54635g.pdf]

## ELECTRONIC SUPPLEMENTARY MATERIAL

### Electronic structure of positive and negative polarons in functionalized dithienylthiazolo[5,4-*d*]thiazoles: a combined EPR and DFT study

Yun Ling,<sup>a</sup> Sarah Van Mierloo,<sup>b</sup> Alexander Schnegg,<sup>c</sup> Matthias Fehr,<sup>c</sup> Peter Adriaensens,<sup>b</sup>  
Laurence Lutsen,<sup>b</sup> Dirk Vanderzande,<sup>b</sup> Wouter Maes,<sup>b</sup> Etienne Goovaerts<sup>a</sup> and Sabine Van  
Doorslaer<sup>\*,a</sup>

## 1. DFT computations

### 1.1. Positive polaron of Th-DTTzTz

#### 1.1.1. Majority species

*Cartesian coordinates (in Å)*

|   |           |           |           |
|---|-----------|-----------|-----------|
| C | -1.537047 | -0.087268 | -0.179879 |
| S | -0.536786 | -1.603293 | -0.201511 |
| N | -0.832244 | 1.049156  | -0.064904 |
| C | 0.468336  | 0.777751  | 0.007035  |
| C | 0.879487  | -0.597589 | -0.046532 |
| S | 1.884592  | 1.783440  | 0.162259  |
| N | 2.180080  | -0.868983 | 0.025211  |
| C | 2.884891  | 0.267449  | 0.140051  |
| C | 4.301716  | 0.331908  | 0.239597  |
| C | 5.240979  | -0.748700 | 0.238683  |
| C | 6.559888  | -0.272597 | 0.355909  |
| C | 6.682382  | 1.129973  | 0.447669  |
| S | 5.107377  | 1.891164  | 0.386645  |
| C | -2.953848 | -0.151700 | -0.279809 |
| C | -3.893110 | 0.928911  | -0.278927 |
| C | -5.211984 | 0.452843  | -0.396703 |
| C | -5.334453 | -0.949706 | -0.488839 |
| S | -3.759469 | -1.710918 | -0.427508 |
| C | -6.540672 | -1.716084 | -0.616842 |
| C | -7.861612 | -1.236742 | -0.677620 |
| C | -8.821784 | -2.267968 | -0.805187 |
| C | -8.245628 | -3.533530 | -0.842536 |
| S | -6.524914 | -3.474888 | -0.722209 |
| C | 7.888639  | 1.896383  | 0.575082  |
| C | 9.209603  | 1.417061  | 0.635470  |
| C | 10.169807 | 2.448311  | 0.762595  |
| C | 9.593651  | 3.713871  | 0.799992  |
| S | 7.872915  | 3.655214  | 0.679999  |
| C | 4.861629  | -2.202533 | 0.126442  |
| C | -3.513782 | 2.382719  | -0.166272 |
| H | 7.434833  | -0.933627 | 0.375696  |
| H | -6.086925 | 1.113880  | -0.416575 |
| H | -8.114196 | -0.169049 | -0.630201 |
| H | -9.905221 | -2.099378 | -0.868590 |
| H | -8.749136 | -4.504567 | -0.935444 |

|   |           |           |           |
|---|-----------|-----------|-----------|
| H | 9.462177  | 0.349363  | 0.588164  |
| H | 11.253260 | 2.279733  | 0.825726  |
| H | 10.097176 | 4.684920  | 0.892664  |
| C | 6.022657  | -3.205263 | 0.145965  |
| C | -4.674932 | 3.385344  | -0.183875 |
| H | 4.256889  | -2.333172 | -0.798209 |
| H | 4.138018  | -2.436520 | 0.938421  |
| H | -2.791253 | 2.617209  | -0.979097 |
| H | -2.907851 | 2.512940  | 0.757636  |
| C | -4.196844 | 4.840463  | -0.064026 |
| C | 5.544500  | -4.660468 | 0.027448  |
| C | -5.335083 | 5.870460  | -0.078344 |
| C | 6.682691  | -5.690504 | 0.042740  |
| C | -4.855126 | 7.324798  | 0.042937  |
| C | -5.994498 | 8.349815  | 0.027781  |
| C | 6.202617  | -7.144979 | -0.076414 |
| C | 7.341979  | -8.170000 | -0.060842 |
| H | 6.606296  | -3.087755 | 1.086406  |
| H | 6.726449  | -2.982970 | -0.687180 |
| H | -5.378135 | 3.161995  | 0.649486  |
| H | -5.259194 | 3.268878  | -1.124059 |
| H | -3.487686 | 5.062036  | -0.893686 |
| H | -3.606473 | 4.955427  | 0.873307  |
| H | 4.954142  | -4.776275 | -0.909790 |
| H | 4.835317  | -4.881234 | 0.857300  |
| H | -6.044649 | 5.647187  | 0.751092  |
| H | -5.924887 | 5.755035  | -1.016484 |
| H | 7.272846  | -5.573852 | 0.980507  |
| H | 7.391962  | -5.468380 | -0.787255 |
| H | -4.144558 | 7.543833  | -0.785612 |
| H | -4.264850 | 7.436233  | 0.980240  |
| H | -6.701512 | 8.182716  | 0.867390  |
| H | -6.579785 | 8.291691  | -0.913915 |
| H | -5.611000 | 9.386148  | 0.117393  |
| H | 5.611650  | -7.257548 | -1.013146 |
| H | 5.492654  | -7.362987 | 0.752923  |
| H | 7.928088  | -8.110592 | 0.880263  |
| H | 8.048264  | -8.004077 | -0.901296 |
| H | 6.958380  | -9.206447 | -0.148686 |

**Table S1.** Principal  $g$  values and direction cosines ( $r_x, r_y, r_z$ ) of  $g$  tensor axes in lab frame in which molecular coordinates are defined as obtained via DFT

|       | $g_x$     | $g_y$      | $g_z$      |
|-------|-----------|------------|------------|
| value | 2.0002685 | 2.0022987  | 2.0036143  |
| $r_x$ | 0.9779455 | -0.0666828 | 0.1979292  |
| $r_y$ | 0.1941104 | -0.0596274 | -0.9791658 |
| $r_z$ | 0.0770956 | 0.9959909  | -0.0453685 |

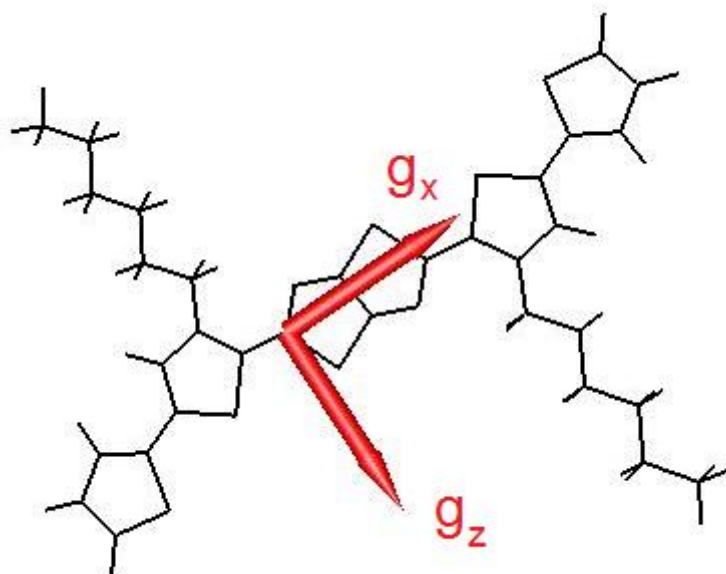

**Figure S1.** Positions of the  $g_x$  and  $g_z$  axis versus the molecular structure. Both axes are in the plane of the molecule, the  $g_y$  axis being perpendicular to it.

### 1.1.2. Minority species

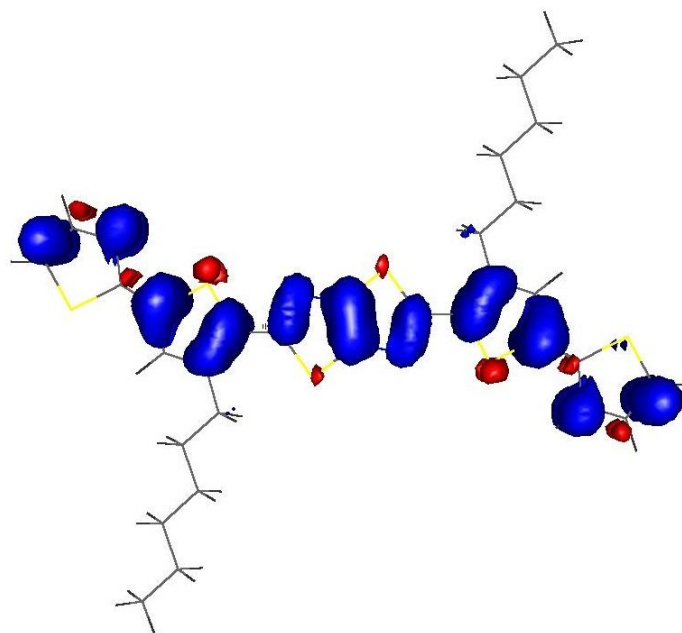

**Figure S2.** Spin density distribution of a minority conformer of the positive **Th-DTTzTz** polaron. Red: negative spin density, blue: positive spin density. Contour levels are set at -0.0012 and 0.0012, respectively.

*Cartesian coordinates (in Å)*

|   |           |          |           |
|---|-----------|----------|-----------|
| C | -7.938179 | 3.239326 | -0.002584 |
| C | -8.806580 | 2.165294 | -0.010311 |
| C | -6.583771 | 2.838706 | -0.001464 |

|   |           |           |           |
|---|-----------|-----------|-----------|
| C | -6.418865 | 1.453444  | -0.008474 |
| S | -7.983659 | 0.656180  | -0.016823 |
| C | -5.200308 | 0.698869  | -0.009406 |
| C | -5.057540 | -0.698029 | -0.015137 |
| C | -3.732673 | -1.152154 | -0.015546 |
| C | -2.816852 | -0.065377 | -0.009964 |
| S | -3.647990 | 1.484622  | -0.002219 |
| C | -1.401769 | -0.029140 | -0.009154 |
| S | -0.359857 | -1.495162 | -0.016013 |
| N | -0.727249 | 1.128547  | -0.003203 |
| C | 0.575255  | 0.909209  | -0.003031 |
| C | 1.025592  | -0.444384 | -0.008706 |
| S | 1.960705  | 1.959992  | 0.003373  |
| N | 2.328096  | -0.663726 | -0.007835 |
| C | 3.002617  | 0.493958  | -0.001471 |
| C | 4.417698  | 0.530186  | 0.000868  |
| C | 5.333524  | 1.616958  | 0.006480  |
| C | 6.658380  | 1.162810  | 0.009340  |
| C | 6.801131  | -0.234099 | 0.006070  |
| S | 5.248826  | -1.019827 | -0.005254 |
| C | 8.019669  | -0.988696 | 0.009598  |
| C | 8.184563  | -2.373971 | 0.005327  |
| C | 9.538953  | -2.774614 | 0.011177  |
| C | 10.407352 | -1.700587 | 0.019678  |
| S | 9.584456  | -0.191446 | 0.020305  |
| C | -3.329419 | -2.605174 | -0.021760 |
| C | 4.930288  | 3.069990  | 0.010352  |
| H | -8.270281 | 4.278198  | 0.002301  |
| H | -9.896463 | 2.187793  | -0.012670 |
| H | -5.744698 | 3.537138  | 0.004477  |
| H | -5.918244 | -1.366007 | -0.019420 |
| H | 7.519087  | 1.830776  | 0.014873  |
| H | 7.345495  | -3.072399 | -0.001676 |
| H | 9.871041  | -3.813500 | 0.009242  |
| H | 11.497223 | -1.723099 | 0.025394  |
| C | 6.077223  | 4.087051  | 0.015532  |
| H | -2.684906 | -2.795645 | 0.856891  |
| H | -2.682958 | -2.787571 | -0.900684 |
| H | 4.283272  | 3.253591  | 0.888627  |
| H | 4.286337  | 3.259271  | -0.868956 |
| C | 5.580701  | 5.536911  | 0.017580  |
| C | 6.710424  | 6.571375  | 0.028089  |
| C | 6.218104  | 8.022701  | 0.024107  |
| C | -4.476347 | -3.622240 | -0.027635 |
| C | -3.979810 | -5.072084 | -0.033499 |
| C | -5.109537 | -6.106559 | -0.042274 |
| C | -4.617161 | -7.557869 | -0.044706 |
| H | 6.719915  | 3.923451  | -0.867746 |
| H | 6.715711  | 3.919365  | 0.901105  |
| H | 4.928505  | 5.697960  | 0.896178  |
| H | 4.939355  | 5.704022  | -0.867854 |
| H | 7.365270  | 6.405814  | -0.848044 |
| H | 7.349310  | 6.405193  | 0.915807  |
| H | -5.115980 | -3.452642 | -0.912013 |
| H | -5.117900 | -3.460568 | 0.856829  |
| H | -3.335797 | -5.240625 | 0.849726  |

|   |           |           |           |
|---|-----------|-----------|-----------|
| H | -3.330261 | -5.231682 | -0.914320 |
| H | -5.752288 | -5.937753 | -0.926704 |
| H | -5.760565 | -5.943643 | 0.837191  |
| C | 7.350602  | 9.050662  | 0.038975  |
| C | -5.749680 | -8.585828 | -0.058123 |
| H | 5.560312  | 8.184296  | 0.897894  |
| H | 5.581419  | 8.186539  | -0.864756 |
| H | -3.976889 | -7.724388 | 0.841077  |
| H | -3.962896 | -7.716776 | -0.921628 |
| H | 8.005804  | 8.939344  | -0.841476 |
| H | 7.982261  | 8.939597  | 0.936488  |
| H | 6.959950  | 10.080545 | 0.033620  |
| H | -6.384709 | -8.472338 | -0.952949 |
| H | -6.401572 | -8.476936 | 0.825084  |
| H | -5.358984 | -9.615708 | -0.057035 |

**Table S2.** Principal  $g$  values and direction cosines ( $r_x, r_y, r_z$ ) of  $g$  tensor axes in lab frame in which molecular coordinates are defined as obtained via DFT.

|       | $g_x$      | $g_y$      | $g_z$     |
|-------|------------|------------|-----------|
| value | 2.0013672  | 2.0022462  | 2.0025647 |
| $r_x$ | 0.9932793  | -0.0008975 | 0.1157383 |
| $r_y$ | -0.1157209 | 0.0112627  | 0.9932179 |
| $r_z$ | -0.0021950 | -0.9999362 | 0.0110831 |

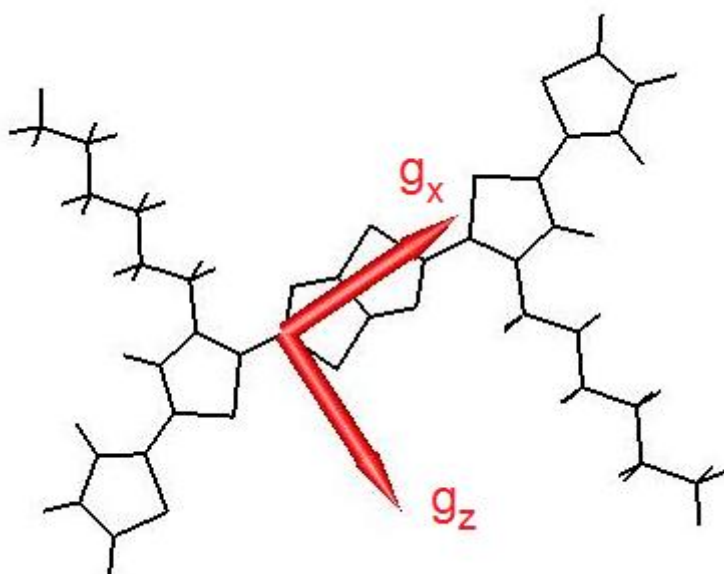

**Figure S3.** Positions of the  $g_x$  and  $g_z$  axis versus the molecular structure. Both axes are in the plane of the molecule, the  $g_y$  axis being perpendicular to it.

## 1.2. Negative polaron of Th-DTTzTz

### 1.2.1. Majority species

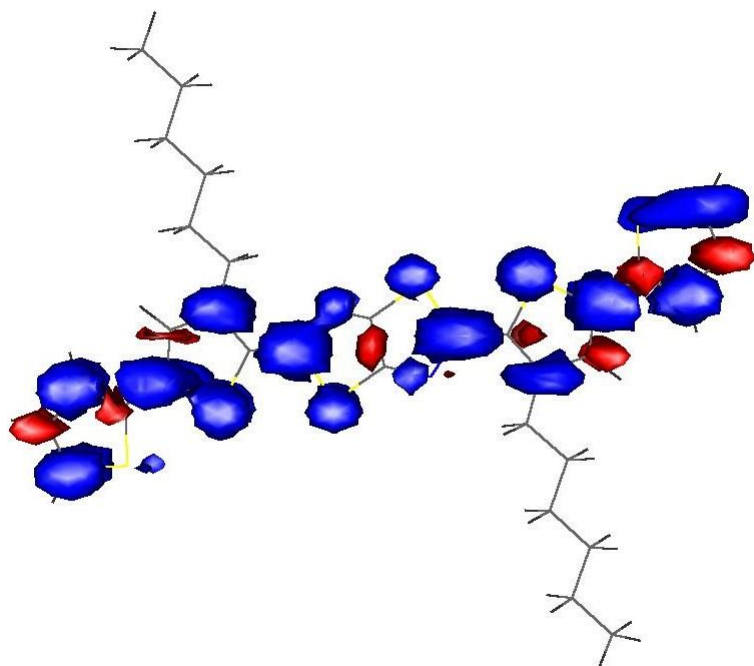

**Figure S4.** Spin density distribution of a majority conformer of the negative **Th-DTTzTz** polaron. Red: negative spin density, blue: positive spin density. Contour levels are set at -0.0012 and 0.0012, respectively.

*Cartesian coordinates (in Å)*

|   |           |           |           |
|---|-----------|-----------|-----------|
| C | -1.561115 | -0.068342 | -0.179065 |
| S | -0.561366 | -1.592578 | -0.201782 |
| N | -0.834572 | 1.057542  | -0.062202 |
| C | 0.468535  | 0.770300  | 0.008963  |
| C | 0.878998  | -0.590417 | -0.044852 |
| S | 1.908840  | 1.772415  | 0.166729  |
| N | 2.182162  | -0.877613 | 0.025506  |
| C | 2.908735  | 0.248313  | 0.141822  |
| C | 4.328406  | 0.312917  | 0.240919  |
| C | 5.276219  | -0.750191 | 0.240549  |
| C | 6.601807  | -0.276595 | 0.357677  |
| C | 6.739398  | 1.119984  | 0.450763  |
| S | 5.144893  | 1.875988  | 0.389335  |
| C | -2.980690 | -0.132838 | -0.279637 |
| C | -3.928419 | 0.930351  | -0.280323 |
| C | -5.253914 | 0.456870  | -0.398934 |
| C | -5.391519 | -0.939698 | -0.492167 |
| S | -3.797153 | -1.695849 | -0.428867 |
| C | -6.596140 | -1.711517 | -0.620874 |
| C | -7.929312 | -1.269580 | -0.684885 |
| C | -8.873937 | -2.325449 | -0.813211 |
| C | -8.293568 | -3.583214 | -0.849867 |

|   |           |           |           |
|---|-----------|-----------|-----------|
| S | -6.555706 | -3.477701 | -0.725362 |
| C | 7.944094  | 1.891900  | 0.578160  |
| C | 9.277366  | 1.450068  | 0.640771  |
| C | 10.222037 | 2.506008  | 0.768175  |
| C | 9.641603  | 3.763721  | 0.805529  |
| S | 7.903644  | 3.658094  | 0.682488  |
| C | 4.878951  | -2.204509 | 0.126412  |
| C | -3.531137 | 2.384640  | -0.165890 |
| H | 7.476846  | -0.940337 | 0.376528  |
| H | -6.128876 | 1.120686  | -0.418747 |
| H | -8.201118 | -0.206186 | -0.638871 |
| H | -9.960631 | -2.165618 | -0.877484 |
| H | -8.777188 | -4.562923 | -0.942091 |
| H | 9.549204  | 0.386693  | 0.594524  |
| H | 11.308804 | 2.346255  | 0.831407  |
| H | 10.125232 | 4.743459  | 0.897404  |
| C | 6.032460  | -3.215724 | 0.145641  |
| C | -4.684728 | 3.395788  | -0.183418 |
| H | 4.274167  | -2.339894 | -0.797886 |
| H | 4.154125  | -2.443238 | 0.936305  |
| H | -2.807265 | 2.623865  | -0.976523 |
| H | -2.925295 | 2.519567  | 0.757754  |
| C | -4.204780 | 4.849717  | -0.063123 |
| C | 5.552466  | -4.669758 | 0.026807  |
| C | -5.336008 | 5.887433  | -0.077707 |
| C | 6.683695  | -5.707463 | 0.041969  |
| C | -4.852223 | 7.340227  | 0.044224  |
| C | -5.985514 | 8.372692  | 0.028603  |
| C | 6.199811  | -7.160418 | -0.077628 |
| C | 7.333145  | -8.192837 | -0.062037 |
| H | 6.620305  | -3.100377 | 1.084522  |
| H | 6.741288  | -2.995943 | -0.684795 |
| H | -5.393135 | 3.174940  | 0.647092  |
| H | -5.273017 | 3.281535  | -1.122157 |
| H | -3.492460 | 5.069960  | -0.890688 |
| H | -3.612814 | 4.963634  | 0.873564  |
| H | 4.960208  | -4.784518 | -0.909594 |
| H | 4.840403  | -4.889246 | 0.854792  |
| H | -6.049109 | 5.667812  | 0.750408  |
| H | -5.927569 | 5.775558  | -1.015824 |
| H | 7.275953  | -5.594317 | 0.979494  |
| H | 7.396184  | -5.488977 | -0.786973 |
| H | -4.139023 | 7.557515  | -0.782680 |
| H | -4.261186 | 7.450112  | 0.981370  |
| H | -6.695610 | 8.206704  | 0.866641  |
| H | -6.571925 | 8.315543  | -0.913178 |
| H | -5.600173 | 9.409551  | 0.118789  |
| H | 5.607702  | -7.271465 | -1.013960 |
| H | 5.487565  | -7.376709 | 0.750359  |
| H | 7.920774  | -8.134360 | 0.878903  |
| H | 8.042151  | -8.028010 | -0.901226 |
| H | 6.947708  | -9.229829 | -0.150269 |

**Table S3.** Principal  $g$  values and direction cosines ( $r_x, r_y, r_z$ ) of  $g$  tensor axes in lab frame in which molecular coordinates are defined as obtained via DFT.

|       | $g_x$      | $g_y$      | $g_z$      |
|-------|------------|------------|------------|
| value | 2.0024173  | 2.0057904  | 2.0083760  |
| $r_x$ | -0.0675252 | -0.5707032 | -0.8183753 |
| $r_y$ | -0.0600949 | 0.8210847  | -0.5676341 |
| $r_z$ | 0.9959061  | 0.0108506  | -0.0897402 |

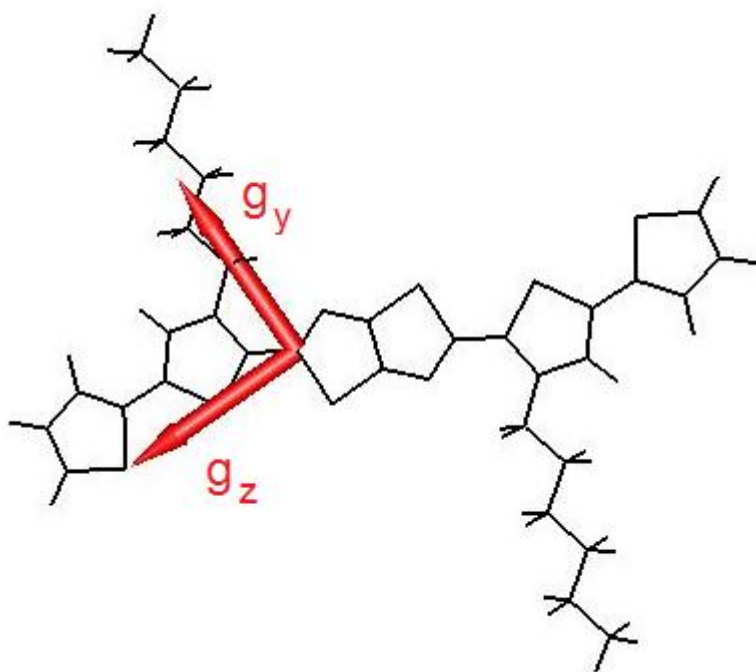

**Figure S5.** Positions of the  $g_y$  and  $g_z$  axis versus the molecular structure. Both axes are in the plane of the molecule, the  $g_x$  axis being perpendicular to it.



### 1.2.2. Minority species

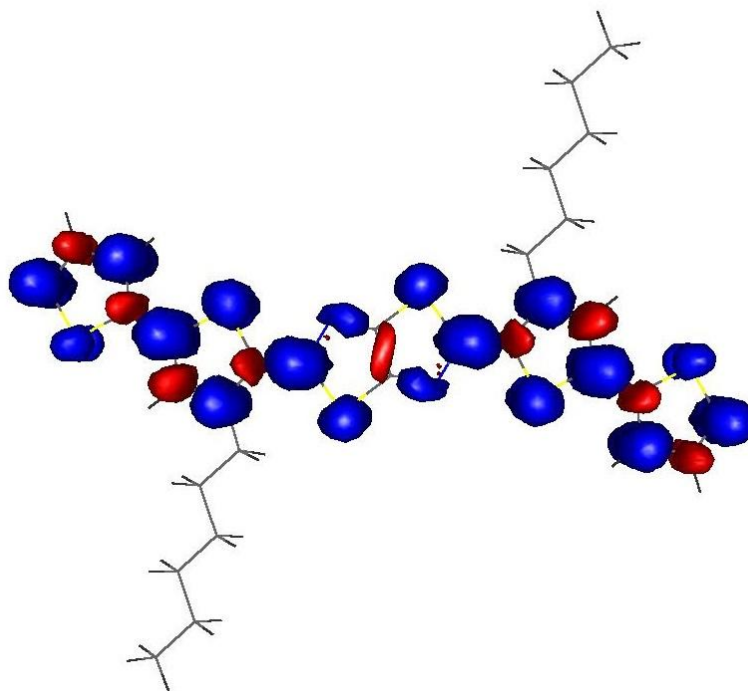

**Figure S6.** Spin density distribution of a minority conformer of the negative **Th-DTTzTz** polaron. Red: negative spin density, blue: positive spin density. Contour levels are set at -0.0012 and 0.0012, respectively.

*Cartesian coordinates (in Å)*

|   |           |           |           |
|---|-----------|-----------|-----------|
| C | -8.034140 | 3.225150  | -0.010475 |
| C | -8.911728 | 2.168228  | -0.016949 |
| C | -6.669292 | 2.825522  | -0.009012 |
| C | -6.490474 | 1.443999  | -0.014393 |
| S | -8.065002 | 0.646994  | -0.021409 |
| C | -5.272090 | 0.684618  | -0.014792 |
| C | -5.104315 | -0.699610 | -0.019570 |
| C | -3.766845 | -1.146466 | -0.018557 |
| C | -2.848879 | -0.070506 | -0.012769 |
| S | -3.701102 | 1.477674  | -0.008948 |
| C | -1.428621 | -0.021851 | -0.009765 |
| S | -0.366218 | -1.493098 | -0.013022 |
| N | -0.739245 | 1.126262  | -0.004284 |
| C | 0.569091  | 0.899498  | -0.002539 |
| C | 1.031764  | -0.434702 | -0.006433 |
| S | 1.967073  | 1.957895  | 0.003983  |
| N | 2.340101  | -0.661468 | -0.004629 |
| C | 3.029479  | 0.486646  | 0.000899  |
| C | 4.449736  | 0.535300  | 0.004046  |
| C | 5.367705  | 1.611261  | 0.009870  |
| C | 6.705174  | 1.164404  | 0.011048  |
| C | 6.872950  | -0.219825 | 0.006335  |
| S | 5.301960  | -1.012882 | 0.000453  |
| C | 8.091333  | -0.979207 | 0.006047  |

|   |            |           |           |
|---|------------|-----------|-----------|
| C | 8.270149   | -2.360733 | 0.001165  |
| C | 9.634997   | -2.760362 | 0.002587  |
| C | 10.512588  | -1.703440 | 0.008547  |
| S | 9.665864   | -0.182202 | 0.012519  |
| C | -3.352326  | -2.600948 | -0.023065 |
| C | 4.953188   | 3.065744  | 0.014281  |
| H | -8.357430  | 4.268811  | -0.006812 |
| H | -10.000612 | 2.188453  | -0.019340 |
| H | -5.829861  | 3.522884  | -0.004099 |
| H | -5.959369  | -1.377479 | -0.023684 |
| H | 7.560228   | 1.842273  | 0.015227  |
| H | 7.430716   | -3.058096 | -0.003329 |
| H | 9.958284   | -3.804025 | -0.000709 |
| H | 11.601472  | -1.723665 | 0.010826  |
| C | 6.096500   | 4.085751  | 0.019512  |
| H | -2.706782  | -2.799971 | 0.853256  |
| H | -2.703809  | -2.793692 | -0.898599 |
| H | 4.304840   | 3.258600  | 0.889919  |
| H | 4.307474   | 3.264657  | -0.861938 |
| C | 5.604395   | 5.536765  | 0.023404  |
| C | 6.731418   | 6.574107  | 0.029575  |
| C | 6.241389   | 8.026001  | 0.032366  |
| C | -4.495637  | -3.620954 | -0.028644 |
| C | -4.003532  | -5.071967 | -0.032953 |
| C | -5.130557  | -6.109308 | -0.038928 |
| C | -4.640529  | -7.561201 | -0.042588 |
| H | 6.742676   | 3.923752  | -0.862320 |
| H | 6.739756   | 3.918037  | 0.902413  |
| H | 4.954029   | 5.699550  | 0.903321  |
| H | 4.958058   | 5.705647  | -0.858332 |
| H | 7.382687   | 6.411784  | -0.850461 |
| H | 7.377693   | 6.406711  | 0.912339  |
| H | -5.138853  | -3.452973 | -0.911521 |
| H | -5.141852  | -3.459223 | 0.853209  |
| H | -3.356900  | -5.241005 | 0.848537  |
| H | -3.353461  | -5.234596 | -0.913116 |
| H | -5.777330  | -5.941546 | -0.921258 |
| H | -5.781330  | -5.947350 | 0.841542  |
| C | 7.372264   | 9.056562  | 0.039330  |
| C | -5.771408  | -8.591759 | -0.049259 |
| H | 5.590261   | 8.187244  | 0.911388  |
| H | 5.596198   | 8.192630  | -0.850021 |
| H | -3.994794  | -7.728175 | 0.839335  |
| H | -3.989943  | -7.722099 | -0.922074 |
| H | 8.020519   | 8.946436  | -0.847084 |
| H | 8.014097   | 8.941479  | 0.929776  |
| H | 6.983724   | 10.088495 | 0.040801  |
| H | -6.413762  | -8.476358 | -0.939288 |
| H | -6.419144  | -8.481950 | 0.837573  |
| H | -5.382869  | -9.623691 | -0.051325 |

**Table S4.** Principal  $g$  values and direction cosines ( $r_x, r_y, r_z$ ) of  $g$  tensor axes in lab frame in which molecular coordinates are defined as obtained via DFT.

|       | $g_x$      | $g_y$     | $g_z$      |
|-------|------------|-----------|------------|
| value | 2.0023616  | 2.0048085 | 2.0085009  |
| $r_x$ | -0.0020488 | 0.1422550 | -0.9898279 |
| $r_y$ | -0.0034779 | 0.9898230 | 0.1422615  |
| $r_z$ | 0.9999919  | 0.0037340 | -0.0015332 |

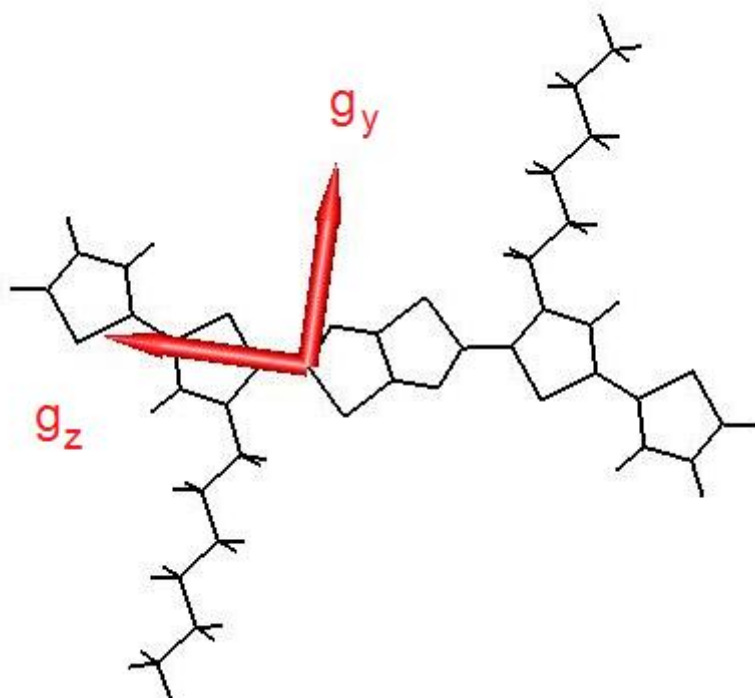

**Figure S7.** Positions of the  $g_y$  and  $g_z$  axis versus the molecular structure. Both axes are in the plane of the molecule, the  $g_x$  axis being perpendicular to it.

### 1.3. Positive polaron of 4-CN-Ph-DTTzTz

#### 1.3.1. Majority species

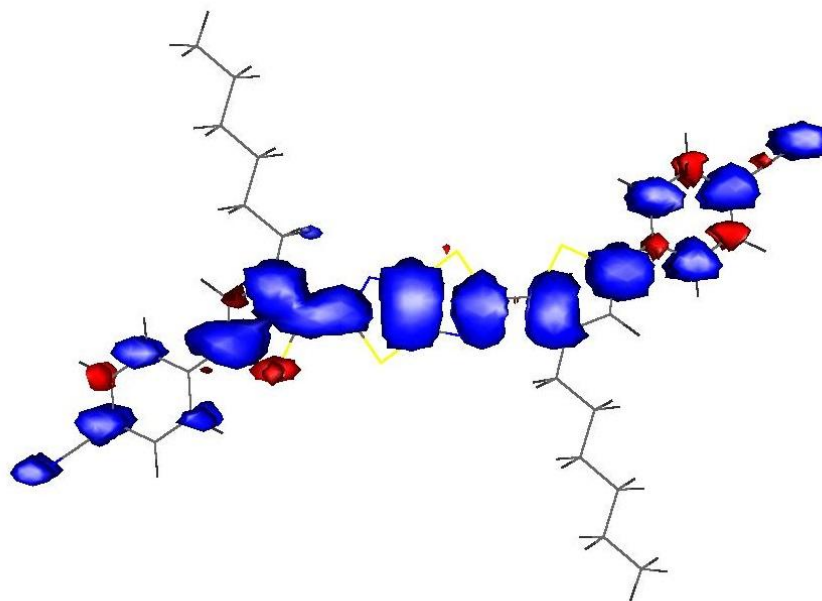

**Figure S8.** Spin density distribution of a majority conformer of the positive **4-CN-Ph-DTTzTz** polaron. Red: negative spin density, blue: positive spin density. Contour levels are set at -0.0012 and 0.0012, respectively.

*Cartesian coordinates (in Å)*

|   |           |           |           |
|---|-----------|-----------|-----------|
| C | -1.454450 | -0.158790 | -0.095962 |
| S | -0.421246 | -1.652833 | -0.089885 |
| N | -0.773817 | 0.997377  | -0.052780 |
| C | 0.533960  | 0.758599  | -0.015145 |
| C | 0.974570  | -0.611222 | -0.026176 |
| S | 1.929798  | 1.800200  | 0.048394  |
| N | 2.282350  | -0.849987 | 0.011682  |
| C | 2.962947  | 0.306202  | 0.054977  |
| C | 4.381239  | 0.404851  | 0.103015  |
| C | 5.342017  | -0.656826 | 0.112341  |
| C | 6.653232  | -0.143495 | 0.165077  |
| C | 6.749384  | 1.260521  | 0.196971  |
| S | 5.155957  | 1.982896  | 0.160741  |
| C | -2.872738 | -0.257471 | -0.143454 |
| C | -3.833556 | 0.804195  | -0.151769 |
| C | -5.144747 | 0.290861  | -0.204978 |
| C | -5.240853 | -1.113135 | -0.238192 |
| S | -3.647461 | -1.835507 | -0.201012 |
| C | 4.997563  | -2.121982 | 0.071056  |
| C | -3.489149 | 2.269339  | -0.109596 |
| H | 7.538671  | -0.790050 | 0.180105  |
| H | -6.030198 | 0.937407  | -0.219883 |

|   |           |           |           |
|---|-----------|-----------|-----------|
| C | 6.185384  | -3.093058 | 0.084170  |
| C | -4.677021 | 3.240371  | -0.121702 |
| H | 4.361205  | -2.304280 | -0.823342 |
| H | 4.311679  | -2.341495 | 0.919394  |
| H | -2.803554 | 2.489444  | -0.958020 |
| H | -2.852526 | 2.451066  | 0.784725  |
| C | -4.236316 | 4.711336  | -0.074837 |
| C | 5.744618  | -4.564038 | 0.038300  |
| C | -5.404877 | 5.706873  | -0.085145 |
| C | 6.913124  | -5.559628 | 0.049492  |
| C | -4.965350 | 7.178116  | -0.038017 |
| C | -6.135973 | 8.167250  | -0.048172 |
| C | 6.473523  | -7.030880 | 0.003353  |
| C | 7.644090  | -8.020070 | 0.014337  |
| H | 6.799321  | -2.924369 | 0.997069  |
| H | 6.851432  | -2.884371 | -0.782773 |
| H | -5.342849 | 3.030997  | 0.745245  |
| H | -5.291168 | 3.072339  | -1.034581 |
| H | -3.565041 | 4.920106  | -0.938623 |
| H | -3.615939 | 4.878797  | 0.834790  |
| H | 5.124359  | -4.732122 | -0.871292 |
| H | 5.073214  | -4.772147 | 0.902145  |
| H | -6.076046 | 5.495895  | 0.778695  |
| H | -6.025032 | 5.537477  | -0.995042 |
| H | 7.533153  | -5.389617 | 0.959360  |
| H | 7.584433  | -5.349305 | -0.814399 |
| H | -4.293637 | 7.385158  | -0.901310 |
| H | -4.344219 | 7.343487  | 0.870936  |
| H | -6.805105 | 8.012658  | 0.824147  |
| H | -6.754146 | 8.054615  | -0.963462 |
| H | -5.781666 | 9.217066  | -0.013435 |
| H | 5.852483  | -7.196859 | -0.905551 |
| H | 5.801702  | -7.237277 | 0.866717  |
| H | 8.262168  | -7.906821 | 0.929614  |
| H | 8.313327  | -7.866131 | -0.858018 |
| H | 7.289731  | -9.069891 | -0.019696 |
| C | -6.439400 | -1.938176 | -0.295615 |
| C | 7.947986  | 2.085586  | 0.253006  |
| C | -7.729391 | -1.337695 | -0.326084 |
| C | -8.883586 | -2.117455 | -0.381630 |
| C | -8.787890 | -3.532515 | -0.408790 |
| C | -7.508473 | -4.145483 | -0.378669 |
| C | -6.360222 | -3.358246 | -0.323116 |
| C | 7.868866  | 3.505684  | 0.279138  |
| C | 9.017166  | 4.292938  | 0.333385  |
| C | 10.296574 | 3.679960  | 0.363561  |
| C | 10.392211 | 2.264872  | 0.337794  |
| C | 9.237966  | 1.485092  | 0.283528  |
| C | -9.973420 | -4.336831 | -0.466400 |
| C | 11.482197 | 4.484231  | 0.419854  |
| H | -7.831787 | -0.243904 | -0.306185 |
| H | -9.873538 | -1.640218 | -0.404769 |
| H | -7.430443 | -5.241677 | -0.399444 |
| H | -5.377616 | -3.855256 | -0.300553 |
| H | 6.886265  | 4.002699  | 0.256512  |
| H | 8.939172  | 5.389155  | 0.353096  |

|   |            |           |           |
|---|------------|-----------|-----------|
| H | 11.382154  | 1.787624  | 0.361004  |
| H | 9.340329   | 0.391280  | 0.264744  |
| N | -10.944492 | -4.996274 | -0.513551 |
| N | 12.453556  | 5.143330  | 0.465895  |

**Table S5.** Principal  $g$  values and direction cosines ( $r_x, r_y, r_z$ ) of  $g$  tensor axes in lab frame in which molecular coordinates are defined as obtained via DFT.

|       | $g_x$     | $g_y$      | $g_z$      |
|-------|-----------|------------|------------|
| value | 2.0007548 | 2.0021805  | 2.0028763  |
| $r_x$ | 0.9677636 | -0.0287185 | 0.2502176  |
| $r_y$ | 0.2497583 | -0.0186572 | -0.9681285 |
| $r_z$ | 0.0324715 | 0.9994134  | -0.0108831 |

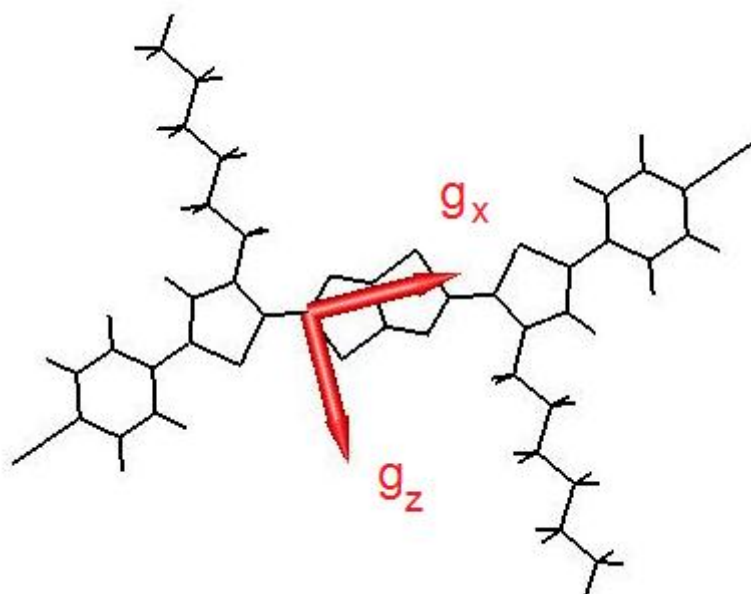

**Figure S9.** Positions of the  $g_x$  and  $g_z$  axis versus the molecular structure. Both axes are in the plane of the molecule, the  $g_y$  axis being perpendicular to it.

### 1.3.2. Minority species

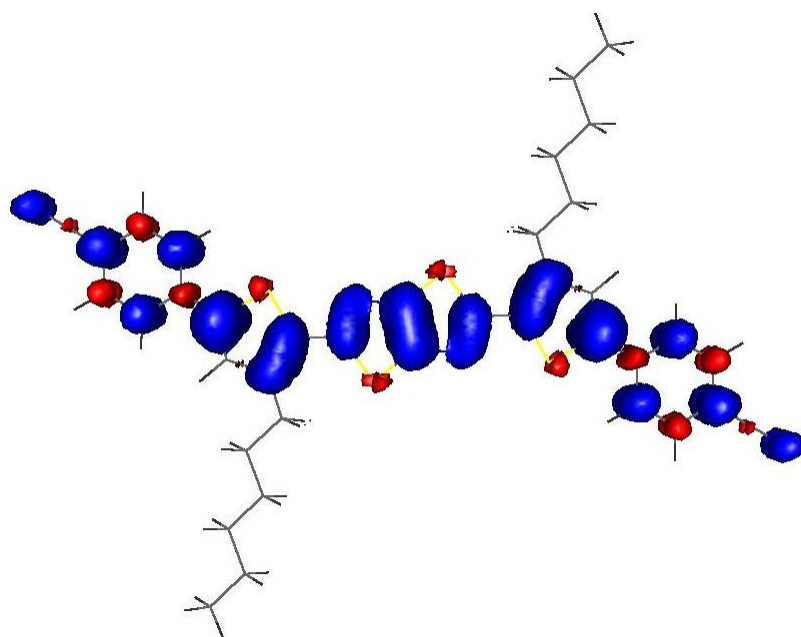

**Figure S10.** Spin density distribution of a minority conformer of the positive **4-CN-Ph-DTTzTz** polaron. Red: negative spin density, blue: positive spin density. Contour levels are set at -0.0012 and 0.0012, respectively.

*Cartesian coordinates (in Å)*

|   |           |           |           |
|---|-----------|-----------|-----------|
| C | -7.679189 | 3.436001  | 0.024262  |
| C | -8.904475 | 2.739068  | 0.036042  |
| C | -6.481176 | 2.734793  | 0.017194  |
| C | -6.459880 | 1.320363  | 0.021599  |
| C | -5.202311 | 0.582117  | 0.014053  |
| C | -5.027156 | -0.808755 | 0.003753  |
| C | -3.691805 | -1.236781 | -0.002069 |
| C | -2.801907 | -0.128692 | 0.004321  |
| S | -3.668972 | 1.398195  | 0.017175  |
| C | -1.387824 | -0.060978 | 0.002241  |
| S | -0.315711 | -1.504295 | -0.008779 |
| N | -0.739514 | 1.112838  | 0.008690  |
| C | 0.565969  | 0.922960  | 0.005172  |
| C | 1.045886  | -0.423887 | -0.004360 |
| S | 1.927564  | 2.003370  | 0.009620  |
| N | 2.351368  | -0.613766 | -0.007849 |
| C | 2.999679  | 0.560049  | -0.001443 |
| C | 4.413761  | 0.627769  | -0.003342 |
| C | 5.303651  | 1.735865  | 0.002866  |
| C | 6.639006  | 1.307845  | -0.002334 |
| C | 6.814170  | -0.083030 | -0.011972 |
| S | 5.280840  | -0.899119 | -0.015512 |
| C | 8.071749  | -0.821270 | -0.018688 |

|   |           |           |           |
|---|-----------|-----------|-----------|
| C | 8.093086  | -2.235679 | -0.010087 |
| C | 9.291111  | -2.936875 | -0.016354 |
| C | 10.516364 | -2.239950 | -0.031517 |
| C | -3.258078 | -2.680395 | -0.013947 |
| C | 4.869909  | 3.179480  | 0.014163  |
| H | -7.677952 | 4.527483  | 0.020434  |
| H | -5.544958 | 3.298222  | 0.007125  |
| H | -5.864764 | -1.502828 | -0.000768 |
| H | 7.476612  | 2.001919  | 0.002432  |
| H | 7.156895  | -2.799093 | 0.002902  |
| H | 9.289908  | -4.028340 | -0.009200 |
| C | 5.993950  | 4.221990  | 0.019685  |
| H | -2.608376 | -2.859809 | 0.863410  |
| H | -2.609295 | -2.845761 | -0.894703 |
| H | 4.222246  | 3.345465  | 0.895643  |
| H | 4.219086  | 3.358249  | -0.862477 |
| C | 5.464498  | 5.660199  | 0.030641  |
| C | 6.570610  | 6.719899  | 0.036676  |
| C | 6.044934  | 8.159455  | 0.046888  |
| C | -4.382132 | -3.722876 | -0.021685 |
| C | -3.852694 | -5.161080 | -0.034162 |
| C | -4.958819 | -6.220751 | -0.042509 |
| C | -4.433160 | -7.660290 | -0.055639 |
| H | 6.636198  | 4.077108  | -0.867196 |
| H | 6.639016  | 4.064687  | 0.902396  |
| H | 4.815516  | 5.803060  | 0.914727  |
| H | 4.813085  | 5.815623  | -0.849532 |
| H | 7.220089  | 6.574827  | -0.847045 |
| H | 7.221813  | 6.562945  | 0.917090  |
| H | -5.026585 | -3.564349 | -0.904623 |
| H | -5.024991 | -3.579207 | 0.864952  |
| H | -3.202033 | -5.317691 | 0.846355  |
| H | -3.202963 | -5.302769 | -0.917887 |
| H | -5.609965 | -6.061964 | -0.922637 |
| H | -5.608350 | -6.077502 | 0.841470  |
| C | 7.153726  | 9.212872  | 0.053326  |
| C | -5.541966 | -8.713678 | -0.064187 |
| H | 5.394779  | 8.301110  | 0.929784  |
| H | 5.393557  | 8.313164  | -0.833087 |
| H | -3.781776 | -7.815788 | 0.824016  |
| H | -3.783017 | -7.800165 | -0.938828 |
| H | 7.798951  | 9.122647  | -0.836805 |
| H | 7.799945  | 9.110725  | 0.941445  |
| H | 6.739192  | 10.233281 | 0.060396  |
| H | -6.188275 | -8.609642 | -0.952022 |
| H | -6.187099 | -8.625328 | 0.826199  |
| H | -5.127446 | -9.734074 | -0.073458 |
| C | -8.900524 | 1.329665  | 0.040618  |
| C | -7.697889 | 0.635402  | 0.033501  |
| C | 9.309724  | -0.136316 | -0.033980 |
| C | 10.512370 | -0.830567 | -0.040323 |
| H | -9.847579 | 0.787045  | 0.050078  |
| H | -7.725152 | -0.454853 | 0.038341  |
| H | 9.336943  | 0.953920  | -0.042388 |
| H | 11.459400 | -0.287956 | -0.052512 |
| C | 11.757346 | -2.959844 | -0.037934 |



|   |            |           |           |
|---|------------|-----------|-----------|
| N | 12.761541  | -3.542775 | -0.043103 |
| C | -10.145433 | 3.458994  | 0.043350  |
| N | -11.149539 | 4.042068  | 0.049670  |

**Table S6.** Principal  $g$  values and direction cosines ( $r_x, r_y, r_z$ ) of  $g$  tensor axes in lab frame in which molecular coordinates are defined as obtained via DFT.

|       | $g_x$      | $g_y$      | $g_z$      |
|-------|------------|------------|------------|
| value | 2.0006758  | 2.0021811  | 2.0030564  |
| $r_x$ | -0.9560462 | -0.0014943 | -0.2932122 |
| $r_y$ | -0.2932070 | -0.0029610 | 0.9560444  |
| $r_z$ | -0.0022968 | 0.9999945  | 0.0023927  |

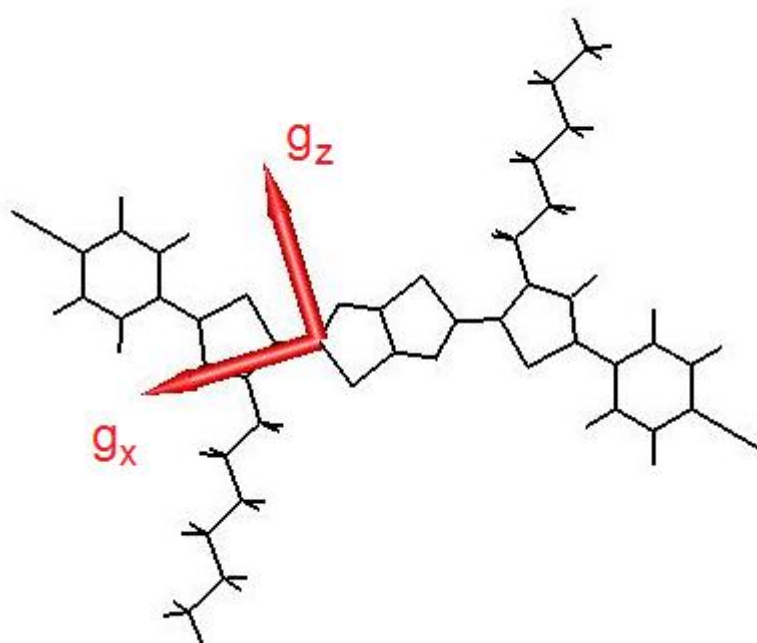

**Figure S11.** Positions of the  $g_x$  and  $g_z$  axis versus the molecular structure. Both axes are in the plane of the molecule, the  $g_y$  axis being perpendicular to it.

#### 1.4. Negative polaron of 4-CN-Ph-DTTzTz

##### 1.4.1. Majority species

*Cartisian coordinates* (in Å)

|   |           |           |           |
|---|-----------|-----------|-----------|
| C | -1.475585 | -0.147994 | -0.094742 |
| S | -0.440555 | -1.644051 | -0.087125 |
| N | -0.779088 | 0.999966  | -0.050551 |

|   |           |           |           |
|---|-----------|-----------|-----------|
| C | 0.533115  | 0.749546  | -0.011985 |
| C | 0.975186  | -0.602370 | -0.022480 |
| S | 1.948827  | 1.791205  | 0.053479  |
| N | 2.287412  | -0.852761 | 0.015473  |
| C | 2.983903  | 0.295203  | 0.059226  |
| C | 4.405556  | 0.397743  | 0.107125  |
| C | 5.374762  | -0.645748 | 0.116646  |
| C | 6.689590  | -0.136621 | 0.168610  |
| C | 6.801683  | 1.265763  | 0.200550  |
| S | 5.185881  | 1.979231  | 0.165573  |
| C | -2.897200 | -0.250498 | -0.143922 |
| C | -3.866399 | 0.793024  | -0.153814 |
| C | -5.181163 | 0.283939  | -0.207903 |
| C | -5.293223 | -1.118434 | -0.241331 |
| S | -3.677523 | -1.831974 | -0.203041 |
| C | 5.012568  | -2.112913 | 0.074861  |
| C | -3.504244 | 2.260169  | -0.110765 |
| H | 7.574752  | -0.786072 | 0.182865  |
| H | -6.066317 | 0.933410  | -0.223141 |
| C | 6.193607  | -3.091882 | 0.085947  |
| C | -4.685267 | 3.239156  | -0.122545 |
| H | 4.375355  | -2.298331 | -0.818048 |
| H | 4.327800  | -2.336271 | 0.922844  |
| H | -2.818558 | 2.484027  | -0.957886 |
| H | -2.867994 | 2.445046  | 0.782952  |
| C | -4.242792 | 4.709018  | -0.075206 |
| C | 5.751113  | -4.561782 | 0.040071  |
| C | -5.404702 | 5.712204  | -0.085254 |
| C | 6.913073  | -5.564915 | 0.049209  |
| C | -4.961413 | 7.182059  | -0.037608 |
| C | -6.126337 | 8.178642  | -0.047505 |
| C | 6.469799  | -7.034813 | 0.002763  |
| C | 7.634779  | -8.031336 | 0.011770  |
| H | 6.813133  | -2.925738 | 0.996257  |
| H | 6.863107  | -2.885200 | -0.779574 |
| H | -5.355749 | 3.031916  | 0.742091  |
| H | -5.303772 | 3.073615  | -1.033669 |
| H | -3.568987 | 4.916910  | -0.937467 |
| H | -3.620297 | 4.875252  | 0.833412  |
| H | 5.127429  | -4.728588 | -0.867622 |
| H | 5.078453  | -4.769170 | 0.903342  |
| H | -6.078743 | 5.504444  | 0.777781  |
| H | -6.027280 | 5.546385  | -0.994778 |
| H | 7.536711  | -5.398652 | 0.957919  |
| H | 7.586086  | -5.357519 | -0.814711 |
| H | -4.287770 | 7.387718  | -0.899893 |
| H | -4.338766 | 7.345683  | 0.870776  |
| H | -6.797797 | 8.024796  | 0.823910  |
| H | -6.746393 | 8.067161  | -0.962382 |
| H | -5.770115 | 9.228955  | -0.012345 |
| H | 5.846104  | -7.198888 | -0.904818 |
| H | 5.797172  | -7.240101 | 0.865927  |
| H | 8.255860  | -7.919443 | 0.925897  |
| H | 8.305248  | -7.877832 | -0.860466 |
| H | 7.278564  | -9.081678 | -0.022548 |
| C | -6.479629 | -1.939436 | -0.298283 |

|   |            |           |           |
|---|------------|-----------|-----------|
| C | 7.988164   | 2.086845  | 0.254485  |
| C | -7.787657  | -1.359587 | -0.330729 |
| C | -8.935378  | -2.142684 | -0.386087 |
| C | -8.850820  | -3.565055 | -0.412790 |
| C | -7.556762  | -4.157882 | -0.380830 |
| C | -6.412813  | -3.368249 | -0.325430 |
| C | 7.921302   | 3.515636  | 0.281778  |
| C | 9.065320   | 4.305346  | 0.334335  |
| C | 10.359477  | 3.712610  | 0.363133  |
| C | 10.444078  | 2.290259  | 0.336259  |
| C | 9.296287   | 1.507085  | 0.283727  |
| C | -10.028818 | -4.369819 | -0.470141 |
| C | 11.537557  | 4.517434  | 0.417599  |
| H | -7.895054  | -0.265151 | -0.311823 |
| H | -9.925819  | -1.663636 | -0.409947 |
| H | -7.466976  | -5.254425 | -0.400435 |
| H | -5.427231  | -3.859713 | -0.301875 |
| H | 6.935641   | 4.007015  | 0.260753  |
| H | 8.975508   | 5.401869  | 0.354169  |
| H | 11.434598  | 1.811291  | 0.357679  |
| H | 9.403711   | 0.412675  | 0.264512  |
| N | -11.002446 | -5.033116 | -0.517631 |
| N | 12.511307  | 5.180695  | 0.462722  |

**Table S7.** Principal  $g$  values and direction cosines ( $r_x, r_y, r_z$ ) of  $g$  tensor axes in lab frame in which molecular coordinates are defined as obtained via DFT.

|       | $g_x$      | $g_y$      | $g_z$      |
|-------|------------|------------|------------|
| value | 2.0023625  | 2.0049263  | 2.0075836  |
| $r_x$ | -0.0339109 | -0.4027183 | -0.9146956 |
| $r_y$ | -0.0193461 | 0.9153150  | -0.4022737 |
| $r_z$ | 0.9992376  | 0.0040543  | -0.0388302 |

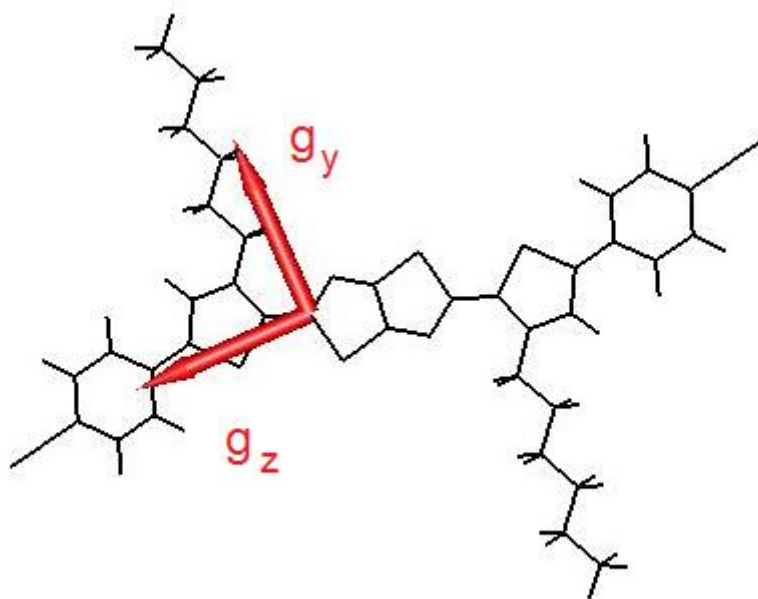

**Figure S12.** Positions of the  $g_y$  and  $g_z$  axis versus the molecular structure. Both axes are in the plane of the molecule, the  $g_x$  axis being perpendicular to it.

#### 1.4.2. Minority species

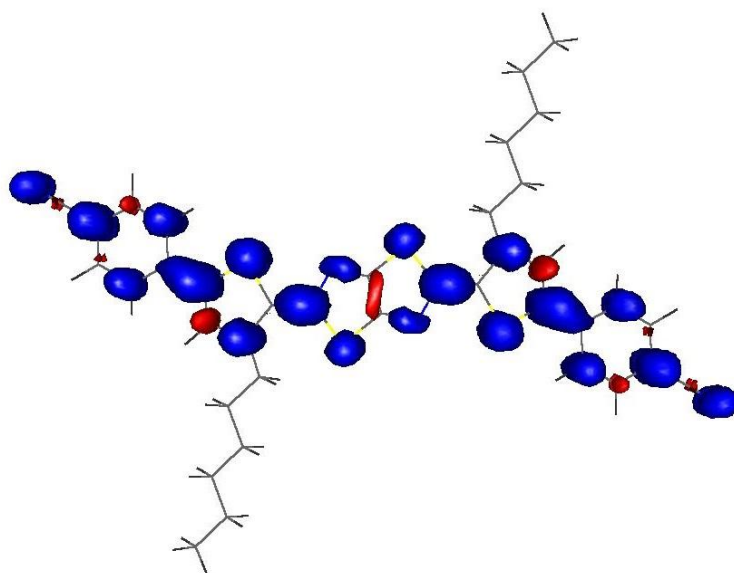

**Figure S13.** Spin density distribution of a minority conformer of the negative **4-CN-Ph-DTTzTz** polaron. Red: negative spin density, blue: positive spin density. Contour levels are set at -0.0012 and 0.0012, respectively.

*Cartesian coordinates (in Å)*

|   |           |           |           |
|---|-----------|-----------|-----------|
| C | -7.760581 | 3.426308  | 0.045590  |
| C | -8.997182 | 2.739994  | 0.046607  |
| C | -6.562662 | 2.730153  | 0.036975  |
| C | -6.519888 | 1.307304  | 0.028814  |
| C | -5.272304 | 0.581426  | 0.019762  |
| C | -5.070393 | -0.801616 | 0.008040  |
| C | -3.726839 | -1.219294 | -0.000365 |
| C | -2.833753 | -0.121822 | 0.005244  |
| S | -3.716247 | 1.401848  | 0.023412  |
| C | -1.413368 | -0.046462 | -0.000542 |
| S | -0.327810 | -1.495230 | -0.016929 |
| N | -0.749494 | 1.114026  | 0.005418  |
| C | 0.563698  | 0.912472  | -0.000769 |
| C | 1.048136  | -0.413324 | -0.011728 |
| S | 1.939634  | 1.994401  | 0.001448  |
| N | 2.361334  | -0.614894 | -0.015584 |
| C | 3.025210  | 0.545582  | -0.008250 |
| C | 4.445607  | 0.620913  | -0.008721 |
| C | 5.338682  | 1.718387  | -0.002079 |
| C | 6.682251  | 1.300679  | -0.003921 |
| C | 6.884185  | -0.082389 | -0.011495 |
| S | 5.328142  | -0.902803 | -0.019961 |
| C | 8.131787  | -0.808289 | -0.013517 |
| C | 8.174579  | -2.231153 | -0.017472 |
| C | 9.372518  | -2.927326 | -0.019285 |
| C | 10.609118 | -2.241017 | -0.017231 |
| C | -3.280765 | -2.664063 | -0.014639 |
| C | 4.892581  | 3.163189  | 0.007029  |
| H | -7.754414 | 4.518981  | 0.051602  |
| H | -5.626385 | 3.293601  | 0.036208  |
| H | -5.901888 | -1.505727 | 0.004284  |
| H | 7.513734  | 2.004790  | 0.001706  |
| H | 7.238302  | -2.794599 | -0.018827 |
| H | 9.366365  | -4.020013 | -0.022209 |
| C | 6.011374  | 4.209871  | 0.013875  |
| H | -2.628056 | -2.851470 | 0.858699  |
| H | -2.631384 | -2.835068 | -0.893770 |
| H | 4.241370  | 3.336822  | 0.884312  |
| H | 4.241695  | 3.347976  | -0.868202 |
| C | 5.483770  | 5.648354  | 0.022497  |
| C | 6.585365  | 6.712538  | 0.029930  |
| C | 6.059492  | 8.151793  | 0.037742  |
| C | -4.399575 | -3.710722 | -0.022281 |
| C | -3.871995 | -5.149162 | -0.037372 |
| C | -4.973603 | -6.213326 | -0.045808 |
| C | -4.447747 | -7.652523 | -0.061522 |
| H | 6.659641  | 4.066152  | -0.869537 |
| H | 6.658945  | 4.055335  | 0.895977  |
| H | 4.831090  | 5.792549  | 0.903850  |
| H | 4.832303  | 5.803572  | -0.857881 |
| H | 7.238799  | 6.568763  | -0.851676 |
| H | 7.236816  | 6.558477  | 0.911266  |
| H | -5.049470 | -3.553008 | -0.902105 |
| H | -5.045511 | -3.570203 | 0.863354  |

|   |            |           |           |
|---|------------|-----------|-----------|
| H | -3.218353  | -5.307505 | 0.840837  |
| H | -3.221496  | -5.290213 | -0.920842 |
| H | -5.627945  | -6.055477 | -0.924326 |
| H | -5.624138  | -6.073370 | 0.838552  |
| C | 7.164764   | 9.209555  | 0.045626  |
| C | -5.553032  | -8.710267 | -0.070171 |
| H | 5.406265   | 8.294261  | 0.918402  |
| H | 5.408796   | 8.304743  | -0.843033 |
| H | -3.794079  | -7.809209 | 0.816394  |
| H | -3.797497  | -7.791225 | -0.944980 |
| H | 7.813584   | 9.118321  | -0.842427 |
| H | 7.810781   | 9.108002  | 0.934602  |
| H | 6.750460   | 10.231218 | 0.050903  |
| H | -6.202124  | -8.604856 | -0.956454 |
| H | -6.198773  | -8.622916 | 0.820513  |
| H | -5.138742  | -9.731888 | -0.081333 |
| C | -8.974241  | 1.324139  | 0.038665  |
| C | -7.774498  | 0.633434  | 0.030145  |
| C | 9.386399   | -0.134422 | -0.011728 |
| C | 10.586160  | -0.825144 | -0.013430 |
| H | -9.918577  | 0.774221  | 0.039493  |
| H | -7.799753  | -0.457830 | 0.024645  |
| H | 9.411641   | 0.956853  | -0.009310 |
| H | 11.530497  | -0.275230 | -0.012038 |
| C | 11.846846  | -2.954000 | -0.018994 |
| N | 12.857666  | -3.533634 | -0.020392 |
| C | -10.234881 | 3.452973  | 0.055453  |
| N | -11.245629 | 4.032687  | 0.063030  |

**Table S8.** Principal  $g$  values and direction cosines ( $r_x, r_y, r_z$ ) of  $g$  tensor axes in lab frame in which molecular coordinates are defined as obtained via DFT.

|       | $g_x$      | $g_y$     | $g_z$      |
|-------|------------|-----------|------------|
| value | 2.0023395  | 2.0047815 | 2.0071833  |
| $r_x$ | 0.0018132  | 0.1321774 | -0.9912244 |
| $r_y$ | -0.0058382 | 0.9912106 | 0.1321649  |
| $r_z$ | 0.9999813  | 0.0055473 | 0.0025689  |

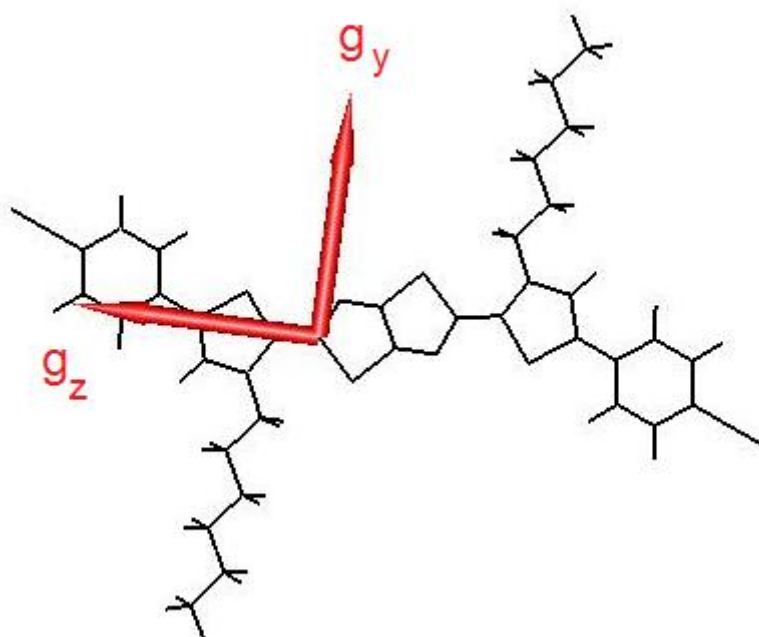

**Figure S14.** Positions of the  $g_y$  and  $g_z$  axis versus the molecular structure. Both axes are in the plane of the molecule, the  $g_x$  axis being perpendicular to it.

### 1.5 Rotation barrier for alkyl side chain

The alkyl rotation barrier was calculated for the dominant species of the positive polaron of **Th-DTTzTz** (Figure S15). The computations were performed in vacuum using the same functional/basis set combinations as for the other computations. The computations support that rotational disorder can be the reason why no clear contribution of the H<sup>E</sup> protons is found in the ENDOR spectra (see main text).

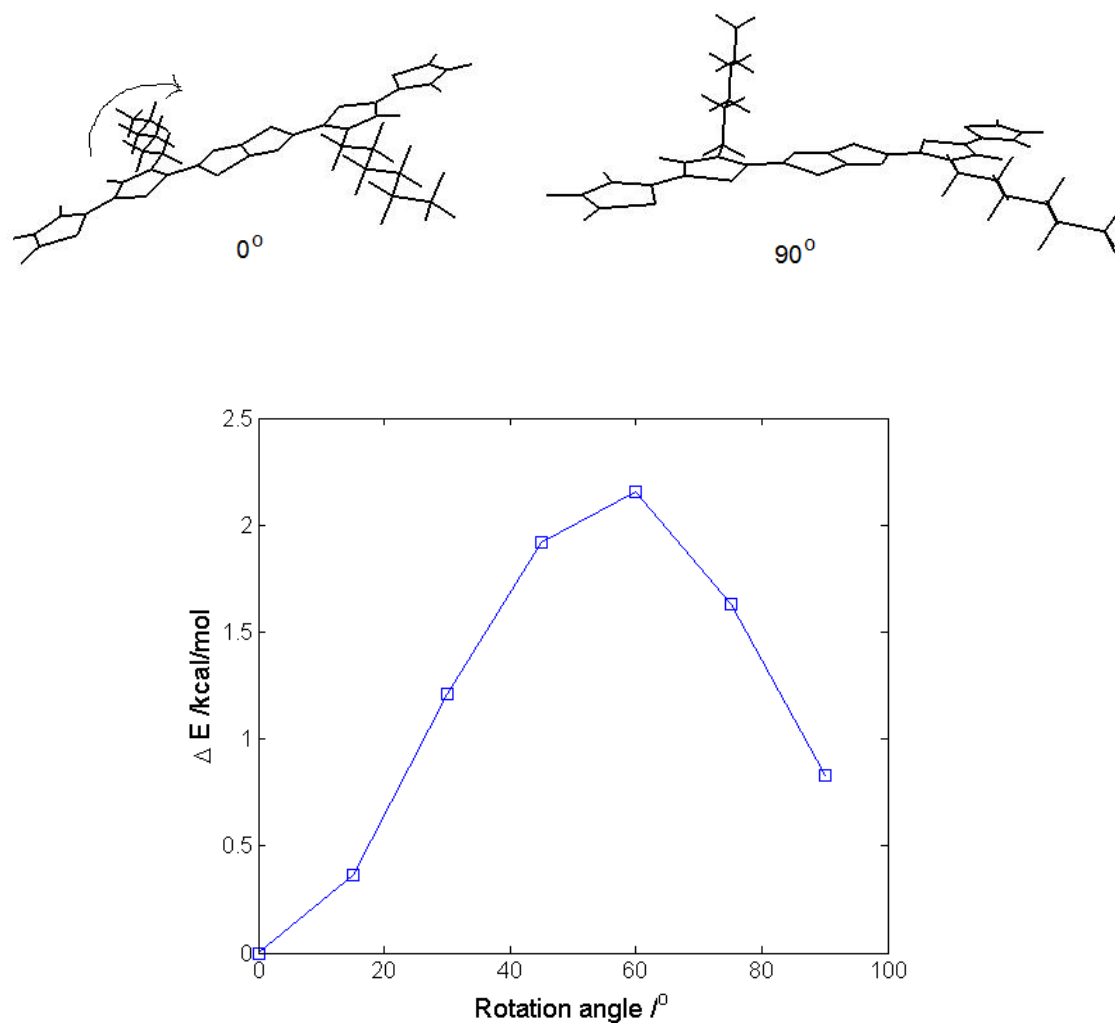

**Figure S15.** Computation of the rotation energy barrier. Rotation around one bond was considered as indicated in the top cartoon.



## 2. Experimental results

### 2.1 $^{14}\text{N}$ HYSCORE of positive polaron of Th-DTTzTz

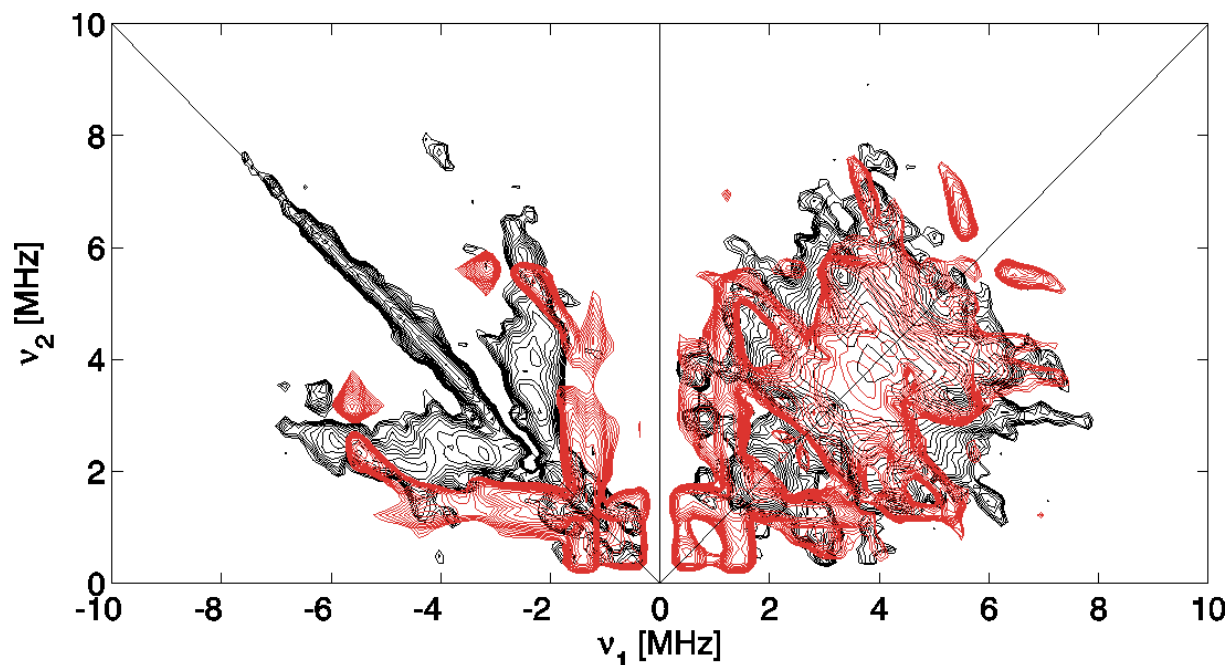

**Figure S16.** Comparison of the experimental (black) and simulated (red) HYSCORE spectrum of an  $\text{I}_2$ -induced positive **Th-DTTzTz** polaron. The simulations are done assuming the DFT-computed spin Hamiltonian values of Table 3 (main text) (the contributions of both equivalent nitrogen nuclei are included).

### 2.2 Light-induced EPR spectrum of the 4-CN-Ph-DTTzTz:MDMO-PPV blend

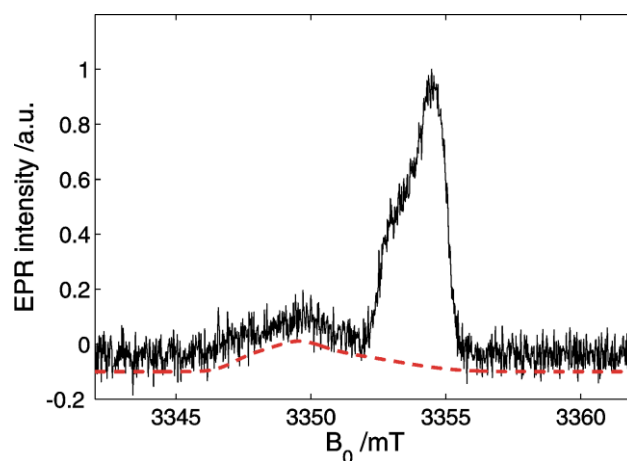

**Figure S17.** Light-induced W-band ESE-detected EPR spectrum of a **4-CN-Ph-DTTzTz:MDMO-PPV** (1:1) blend. The experiment is given in solid black, The simulation (red dashed line) is performed using the principal  $g$  values of Table 1 (main text). The second signal corresponds to the positive MDMO-PPV polaron (see reference 14 of main text).
